# Supplementary material
Source: publisher site journal article supplement (https://www.dovepress.com/article/356666)
Supplement: Supplementary file 1 [file get_supplementary_file.php]

**Supplementary materials. Table S1:** Details of Characteristics of included RCTs

| **First author**  **(year)** | **Country** | **Patients (n)** | **Interventions** | **Course of treatment** |
| --- | --- | --- | --- | --- |
| Jia 20041 | China | 66 | AT group: AT + conventional drugs  PR group: PR + conventional drugs  AT + PR group: AT+ PR + conventional drugs | 100 days |
| Suzuki et al. 20082 | Japan | 30 | EG: AT + conventional drugs  CG: conventional drugs | 10 weeks |
| Wan et al.20093 | China | 150 | EG: AT + chinese medicine  CG: chinese medicine alone | 45 days |
| Xie 20094 | China | 86 | EG: AT + chinese medicine  CG: chinese medicine alone | 45 days |
| Yang et al.20095 | China | 80 | EG: AT + PR  CG: PR | 60 days |
| Chen 20106 | China | 40 | EG: AT + chinese medicine + conventional therapy  CG: chinese medicine + conventional therapy | 6 days |
| Deering et al. 20117 | Ireland | 60 | AT + PR group: AT+ PR  PR group: PR alone  CG: no intervention | 8 weeks |
| Gao et al. 20118 | China | 60 | EG: warm AT  CG: western medicine | 8 weeks |
| Suzuki et al. 20129 | Japan | 68 | EG: AT + daily medication  CG: placebo acupuncture + daily medication | 12 weeks |
| Cao et al. 201210 | China | 60 | AT + auricular point group: AT + auricular point + conventional therapy  AT group: AT + simulated auricular point + conventional therapy  auricular point group: simulated acupuncture + auricular point + conventional therapy  CG: simulated acupuncture + simulated auricular point + conventional therapy | 20 days |
| Shao et al. 201211 | China | 60 | AT + acupoint sticking group: AT + acupoint sticking + conventional therapy  AT group: AT + simulated acupoint sticking + conventional therapy  acupoint sticking group: acupoint sticking + simulated acupuncture + conventional therapy  CG: simulated acupuncture + simulated acupoint sticking + conventional therapy | 20 days |

| Chen 201312 | China | 57 | EG: AT + conventional therapy  CG: conventional therapy | 2 weeks |
| --- | --- | --- | --- | --- |
| Zhang and Liao 201313 | China | 140 | Feishu group: Feishu acupoint + conventional drugs  Zhigou group: Zhigou acupoint + conventional drugs  Feishu + Zhigou group: Feishu acupoint + Zhigou acupoint + conventional drugs  CG: conventional drugs | 14 days |
| Xie and Yu 201414 | China | 80 | EG: warm AT + western medicine  CG: western medicine | 8 weeks |
| Gao et al. 201415 | China | 62 | EG: electroacupuncture + conventional therapy  CG: conventional therapy | 24 days |
| Tong et al.201416 | China | 30 | EG: AT + aerobic exercise  CG: placebo acupuncture + aerobic exercise | 5 weeks |
| Yu 201417 | China | 60 | EG: warm AT + function training  CG: conventional drugs + function training | 3 months |
| Chu and Cai 201518 | China | 64 | EG: AT + chinese medicine + western medicine  CG: chinese medicine + western medicine | 3 months |
| He et al. 201519 | China | 60 | EG: warm AT + conventional therapy  CG: western medicine + conventional therapy | 10 days |
| Li 201520 | China | 60 | EG: warm AT + western medicine  CG: western medicine | 1 months |
| Liu et al. 201521 | China | 80 | EG: AT + western medicine  CG: western medicine | 3 months |
| Feng et al.201622 | China | 72 | EG: AT + daily medication  CG: sham acupuncture + daily medication | 8 weeks |
| Deng et al. 201623 | China | 44 | EG: abdominal AT + western medicine  CG: western medicine | 24 weeks |
| Guan et al. 201624 | China | 68 | EG: abdominal AT + conventional therapy  CG: conventional therapy | 14 days |
| Hu 201625 | China | 89 | EG: warm AT + conventional therapy  CG: spreading moxibustion+ conventional therapy | 2 months |
| Li et al. 201626 | China | 60 | EG: AT + chinese medicine + western medicine  CG: chinese medicine + western medicine | 3 weeks |
| Zhou 201627 | China | 60 | EG: floating needle + conventional therapy  CG: conventional therapy | 10 days |
| Ge et al. 201728 | China | 44 | EG: AT + aerobic exercise + conventional drugs  CG: placebo acupuncture + aerobic exercise + conventional drugs | 7 weeks |

| Li 201729 | China | 90 | EG: warm AT + function training  CG: western medicine + function training | 4 weeks |
| --- | --- | --- | --- | --- |
| Shi 201730 | China | 61 | EG: AT  CG: western medicine | 2 months |
| Chen et al. 201831 | China | 60 | EG: high frequency electroacupuncture + conventional therapy  CG: low frequency electroacupuncture + conventional therapy | 4 weeks |
| Chen 201832 | China | 94 | EG: electroacupuncture + conventional therapy  CG: western medicine + conventional therapy | 8 weeks |
| Yang and Li 201833 | China | 60 | EG: AT  CG: western medicine | 8 weeks |
| Zhong 201834 | China | 60 | EG: abdominal AT + conventional drugs  CG: conventional drugs | 7 days |
| Zhou and Shao 201935 | China | 86 | EG: warm AT+auricular acupuncture+conventional drugs  CG: conventional drugs alone | 3 months |
| Li et al. 201936 | China | 102 | EG: AT + conventional therapy  CG: conventional therapy | 6 weeks |
| He et al. 201937 | China | 60 | EG: AT + chinese medicine + conventional therapy  CG: chinese medicine + conventional therapy | 2 weeks |
| Lv 201938 | China | 120 | AT group: AT  chinese medicine group: chinese medicine  AT+chinese medicine group: AT+chinese medicine | 8 weeks |
| Xie et al.201939 | China | 90 | AT group: warm AT + conventional therapy  western medicine group: conventional therapy  sham AT group: sham acupuncture + conventional therapy | 14 days |
| Zhang and Liu 201940 | China | 120 | EG: AT + western medicine  CG: western medicine | 4 weeks |
| Jiao 202041 | China | 30 | EG: AT + health education + conventional drugs  CG: health education + conventional drugs | 3 months |
| Li and Liu 202042 | China | 80 | EG: AT + western medicine  CG: western medicine | 3 months |
| Zhang 202043 | China | 61 | EG: floating needle + conventional therapy  CG: conventional therapy | 3 days |
| Wang and Wang 202144 | China | 82 | EG: AT + conventional therapy  CG: conventional therapy | 60 days |

**Table S2:** Detailed description of checklist items


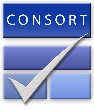
CONSORT 2010 checklist of information to include when reporting a randomized trial

| **Section/Topic** | **Item No** | **Checklist Item** |
| --- | --- | --- |
| **Title and abstract** | | |
|  | 1a | Identification as a randomised trial in the title |
| 1b | Structured summary of trial design, methods, results, and conclusions (for specific guidance see CONSORT for abstracts) |
| **Introduction** | | |
| Background and objectives | 2a | Scientific background and explanation of rationale |
| 2b | Specific objectives or hypotheses |
| **Methods** | | |
| Trial design | 3a | Description of trial design (such as parallel, factorial) including allocation ratio |
| 3b | Important changes to methods after trial commencement (such as eligibility criteria), with reasons |
| Participants | 4a | Eligibility criteria for participants |
| 4b | Settings and locations where the data were collected |
| Interventions | 5 | The interventions for each group with sufficient details to allow replication, including how and when they were actually administered |
| Outcomes | 6a | Completely defined pre-specified primary and secondary outcome measures, including how and when they were assessed |
| 6b | Any changes to trial outcomes after the trial commenced, with reasons |
| Sample size | 7a | How sample size was determined |
| 7b | When applicable, explanation of any interim analyses and stopping guidelines |
| Randomisation | 8a | Method used to generate the random allocation sequence |
| 8b | Type of randomisation; details of any restriction (such as blocking and block size) |
| Allocation  concealment  mechanism | 9 | Mechanism used to implement the random allocation sequence (such as sequentially numbered containers), describing any steps taken to conceal the sequence until interventions were assigned |
| Implementation | 10 | Who generated the random allocation sequence, who enrolled participants, and who assigned participants to interventions |
| Blinding | 11a | If done, who was blinded after assignment to interventions (for example, participants, care providers, those assessing outcomes) and how |
| 11b | If relevant, description of the similarity of interventions |
| Statistical methods | 12a | Statistical methods used to compare groups for primary and secondary outcomes |
| 12b | Methods for additional analyses, such as subgroup analyses and adjusted analyses |
| **Results** | | |
| Participant flow (a diagram is strongly recommended) | 13a | For each group, the numbers of participants who were randomly assigned, received intended treatment, and were analysed for the primary outcome |
| 13b | For each group, losses and exclusions after randomisation, together with reasons |
| Recruitment | 14a | Dates defining the periods of recruitment and follow-up |
| 14b | Why the trial ended or was stopped |
| Baseline data | 15 | A table showing baseline demographic and clinical characteristics for each group |
| Numbers analysed | 16 | For each group, number of participants (denominator) included in each analysis and whether the analysis was by original assigned groups |
| Outcomes and estimation | 17a | For each primary and secondary outcome, results for each group, and the estimated effect size and its precision (such as 95% confidence interval) |
| 17b | For binary outcomes, presentation of both absolute and relative effect sizes is recommended |
| Ancillary analyses | 18 | Results of any other analyses performed, including subgroup analyses and adjusted analyses, distinguishing pre-specified from exploratory |
| Harms | 19 | All important harms or unintended effects in each group (for specific guidance see CONSORT for harms) |
| **Discussion** | | |
| Limitations | 20 | Trial limitations, addressing sources of potential bias, imprecision, and, if relevant, multiplicity of analyses |
| Generalisability | 21 | Generalisability (external validity, applicability) of the trial findings |
| Interpretation | 22 | Interpretation consistent with results, balancing benefits and harms, and considering other relevant evidence |
| **Other information** | | |
| Registration | 23 | Registration number and name of trial registry |
| Protocol | 24 | Where the full trial protocol can be accessed, if available |
| Funding | 25 | Sources of funding and other support (such as supply of drugs), role of funders |

**Notes:** Adap​ted from Schulz KF, Altman DG, Moher D, for the CONSORT Group (2010) CONSORT 2010 Statement: Updated Guidelines for Reporting Parallel Group Randomised Trials. PLoS Med 7(3): e1000251. Copyright: © 2010 Schulz et al.45 Creative Commons Attribution CC BY 2.0 (<https://creativecommons.org/licenses/by/2.0/legalcode>).

**STRICTA 2010 checklist of information to include when reporting interventions**

**in a clinical trial of acupuncture.**

| **Item** | **Item No -- Detail** |
| --- | --- |
| **Acupuncture rationale** | 1a) Style of acupuncture (e.g. Traditional Chinese Medicine, Japanese, Korean, Western medical, Five Element, ear acupuncture, etc |
| 1b) Reasoning for treatment provided, based on historical context, literature sources, and/or consensus methods, with references where appropriate |
| 1c) Extent to which treatment was varied |
| **Details of needling** | 2a) Number of needle insertions per subject per session (mean and range where relevant) |
| 2b) Names (or location if no standard name) of points used (uni/bilateral) |
| 2c) Depth of insertion, based on a specified unit of measurement, or on a particular tissue level |
| 2d) Response sought (e.g. de qi or muscle twitch response) |
| 2e) Needle stimulation (e.g. manual, electrical) |
| 2f) Needle retention time |
| 2g) Needle type (diameter, length, and manufacturer or material) |
| **Treatment regimen** | 3a) Number of treatment sessions |
| 3b) Frequency and duration of treatment sessions |
| **Other components of treatment** | 4a) Details of other interventions administered to the acupuncture group (e.g. moxibustion, cupping, herbs, exercises, lifestyle, advice) |
| 4b) Setting and context of treatment, including instructions to practitioners, and information and explanations to patients |
| **Practitioner background** | 5) Description of participating acupuncturists (qualification or professional affiliation, years in acupuncture practice, other relevant experience) |
| **Control or comparator**  **interventions** | 6a) Rationale for the control or comparator in the context of the research question, with sources that justify this choice |
| 6b) Precise description of the control or comparator. If sham acupuncture or any other type of acupuncture-like control is used, provide details as for Items 1 to 3 above |

**Notes:** Adapted from MacPherson H, Altman DG, Hammerschlag R, et al.; STRICTA Revision Group. Revised STandards for Reporting Interventions in Clinical Trials of Acupuncture (STRICTA): extending the CONSORT statement. PLoS Med. 2010;7(6):e1000261.46 [Creative Commons Attribution 3.0 Unported (CC BY 3.0; https:// creativecommons.org/licenses/by/3.0/legalcode)](file:///C:\Users\tania\Downloads\Creative%20Commons%20Attribution%203.0%20Unported%20(CC%20BY%203.0;%20https:\%20creativecommons.org\licenses\by\3.0\legalcode)).

**References**

1. Jia J. Clinical study on acupuncture combined with rehabilitation training for improvement of pulmonary function in the patient of chronic obstructive pulmonary disease. *Chinese Acupuncture and Moxibustion*. 2004(10):19–21.
2. Suzuki M, Namura K, Ohno Y, et al. The effect of acupuncture in the treatment of chronic obstructive pulmonary disease. *J Altern Complement Med*. 2008;14(9):1097–1105.
3. Wan WR, Cheng SL, Zhang W, et al. Clinical study on effect of lung-fuction of patients with COPD in remission stage treatd by acupuncture and moxbustion combining with chinese herbs for warming Kidney-yang and regulating qi. *Chinese Archives of Traditional Chinese Medicine.* 2009;27(1):163–165.
4. Xie YY. Clinical study on improving the pulmonary function of stable chronic obstructive pulmonary disease by acupuncture therapy combined with chinese medicinal herb. *Fujian University of Traditional Chinese Medicine.* 2009.
5. Yang P, Zhang YL, Peng M. Effect of Peitu Shengjin acupuncture on the quality of life of patients with COPD in remission stage. *Journal of Liaoning University of Traditional Chinese Medicine*. 2009;11(03):149–150.
6. Chen WQ. CIinical research of curing type of phlegm-heat obstructing lungs of AECOPD by using acupuncture therapy and conventioned treatment. *Guangzhou University of traditional Chinese Medicine*. 2010.
7. Deering BM, Fullen B, Egan C, et al. Acupuncture as an adjunct to pulmonary rehabilitation. *J Cardiopulm Rehabil Prev*. 2011;31(6):392–399.
8. Gao J, OuYang BS, Sun G, Fan C, Wu YJ, Ji LL. Comparative research on effect of warm needling therapy on pulmonary function and life quality of patients with COPD in the stable phase. *Chinese Acupuncture and Moxibustion*. 2011;31(10):893–897.
9. Suzuki M, Muro S, Ando Y, et al. A randomized, placebo-controlled trial of acupuncture in patients with chronic obstructive pulmonary disease (COPD): the COPD-acupuncture trial (CAT). *Arch Intern Med*. 2012;172(11):878–886.
10. Cao L, Shao MM, Liu ZY. Study on improving the quality of life of patients with acute exacerbation of COPD by acupuncture combined with auricular point. *Yunnan Journal of Traditional Chinese Medicine and Materia Medica*. 2012;33(04):53–55.
11. Shao MM, Cao L, Liu ZY. Acupuncture combined with acupoint sticking in the treatment of 15 cases of acute exacerbation of chronic obstructive pulmonary disease. *Journal of Traditional Chinese Medicine*. 2012;53(07):606–607.
12. Chen ZY. The study of the clinical curative effect of pulse acupuncture treatment of acute exacerbation of chronic obstructive puImonary disese patients. *Guangzhou University of traditional Chinese Medicine*. 2013.
13. Zhan YM, Liao H. Effect of acupuncture for Yichuanfang on pulmonary function and humoral immunity in AECOPD patients. *Journal of Tianjin University of Traditional Chinese Medicine*. 2013;32(02):80–83.
14. Xie JH, Yu JH. Effect of warming needle moxibustion on pulmonary function of elderly patients with stable chronic obstructive pulmonary disease. *World Journal of Acupuncture-Moxibustion*. 2014;24(3):21–24.
15. Gao Y, Ma Y, Sun LR, et al. Efficacy and evaluation of acupuncture in acute exacerbation of chronic obstructive pulmonary disease. *Chinese Journal for Clinicians*. 2014,42 (10):42–44.
16. Tong J, Guo YM, He Y, Li GY, Chen F, Yao Hong. Regulatory effects of acupuncture on exercise tolerance in patients with chronic obstructive pulmonary disease at stable phase: a randomized controlled trial. *Chinese Acupuncture and Moxibustion*. 2014;34 (09):846–850.
17. Yu Z. Influence of Warming Needle Moxibustion on Lung Function of Senile Chronic

Obstructive Pulmonary Disease in the Stable Period. *Acta Chinese Medicine*. 2014;29 (04):485–486.

1. Chu EX, Cai SC. Observation the efficacy of acupuncture combined with western medicine for the treatment of stable phase of chronic obstructive pulmonary disease. *Clinical journal of traditional chinese medicine*. 2015;27(01):82–84.
2. He L, Zhang YM, Qin SJ, Wei QX, Wei SK, Zhuo B. Clinical research of antibacterial agents combined with acupuncture in treatment of acute exacerbation of chronic obstructive pulmonary disease. *Internal Medicine*. 2015;10(06):775–777.
3. Li XL. Observation on clinical efficacy of warm acupuncture therapy in the treatment of patients with stable COPD in dog days. *Fujian University of Traditional Chinese Medicine*. 2015.
4. Liu LJ, Shi MY, Song XM, Zhang W, Jiang CJ. Clinical effect of acupuncture for chronic obstructive pulmonary disease. *Journal of Acupuncture and Tuina Science*. 2015;13 (05):306–311.
5. Feng JF, Wang XH, Li X, Zhao DJ, Xu JQ. Acupuncture for chronic obstructive pulmonary disease (COPD): A multicenter, randomized, sham-controlled trial. *Medicine (Baltimore)*. 2016;95(40):e4879.
6. Deng CH, Zhang DT, Wang NW. Application of abdominal acupuncture in the treatment of 22 cases with stable chronic obstructive pulmonary disease. *Yunnan Journal of Traditional Chinese Medicine and Materia Medica*. 2016;37(08):73–74.
7. Guan W, Shang F, Wang Y. The effect of abdominal acupuncture on respiratory muscle fatigue in acute exacerbation of chronic obstructive pulmonary disease. *Journal of Emergency in Traditional Chinese Medicine*. 2016,25(04):594–597+615.
8. Hu NX. Effect of spreading moxibustion on elderly patients with chronic obstructive pulmonary disease. *Chinese Journal of Modern Drug Application*. 2016;10(08):254–256.
9. Li XY, Peng L, Cao JZ, Yang AH, Huang C, Liu XJ. Clinical study of acupuncture combined with medicine in the treatment of moderate and severe stable chronic obstructive pulmonary disease. *Continuing Medical Education*. 2016;30(10):158–160.
10. Zhou X. Clinical Research on the effect of FU’s acupuncture in the impact of pulmonary function of patients with mild to moderate chronic pulmonary obstructive disease. *Nanjing University of traditional Chinese Medicine*. 2016.
11. Ge Y, Yao H, Tong J, He Y, Li GY, Kong XA. Effects of acupuncture on peripheral skeletal muscle exercise ability in patients with chronic obstructive pulmonary disease at stable phase. *Chinese Acupuncture and Moxibustion*. 2017;37(4):366–371.
12. Li LX. Evaluation of acupuncture in the rehabilitation treatment of chronic obstructive pulmonary disease. *Shenzhen Journal of Integrated Traditional Chinese and Western*

*Medicine*. 2017;27(22):33–35.

1. Shi Y. Effects of Zong Qi Tonifying Acupuncture on Pulmonary Function of Patients with Chronic Obstructive Pulmonary Disease in Stable Phase. *Fujian University of Traditional Chinese Medicine*. 2017.
2. Chen JF, Luo WX, Zhou HF. Effects of Different Acupuncture Frequency on Respiratory Function and Immune Status in Patients with Stable Chronic Obstructive Pulmonary Disease. *World Chinese Medicine*. 2018;13(11):2839–2842.
3. Chen NH. Clinical efficacy of acupuncture in the treatment of stable chronic obstructive pulmonary disease and its influence on pulmonary function and health status of patients.

*Hebei Journal of Traditional Chinese Medicine*.2018;40(3):434–437.

1. Yang JS, Li J. Comparative researchon effect of acupuncture on pulmonary function and

life quality of patients with stable chronic obstructive pulmonary disease. *Journal of Hubei University of Chinese Medicine*. 2018;20(04):30–33.

1. Zhong GJ. Clinical Observation on Bo’s Abdominal Acupuncture for Chronic Obstructive Pulmonary Disease of Deficiency of Kidney Failing to Grasp Qi Type. *Journal of New Chinese Medicine*. 2018;50(10):190–192.
2. Zhou Y, Shao WT. Effects of warm acupuncture combined with auricular acupuncture on cardiopulmonary function and blood oxygen saturation in patients with chronic obstructive pulmonary disease with deficiency of spleen and kidney Yang. *Journal of Yunnan University of Traditional Chinese Medicine*. 2018;41(05):69–71.
3. Li Y, Xiong C, Zeng Y, et al. Acupuncture treatment of lung-spleen Qi deficiency in stable chronic obstructive pulmonary disease: a randomized, open-label, controlled trial. *Journal of Traditional Chinese Medicine*. 2019;39(06):885–891.
4. He F, Wu JF, He XW, Huang MR. Effects and mechanism of modified MengShiGunTan- wan combined acupuncture on IL-6,IL-1β and TNF-α in serum and exhaled breath condensate of patients at acute exacerbation stage of COPD. *Jiangxi Medical Journal*.

2019;54(07):739–743.

1. Lv ZJ. Clinical study on Linggui Zhugan Decoction Combined with Wenyang Tongluo Method Acupuncture and Moxibustion in the Treatment of Chronic Obstructive Pulmonary Disease. *Guangming Journal of Chinese Medicine*. 2019;34(14):2115–2117.
2. Xie F, Wu YP, Liu L, Ren JG, Zhang BD. Warm acupuncture on chronic obstructive pulmonary disease with phlegm-turbid obstructing of the lung: a randomized controlled trial. *Chinese Acupuncture and Moxibustion*. 2019;39(09):918–922.
3. Zhang JY, Liu X. Effects of acupuncture at Inner umbilical ring point of Zhuang medicine on pulmonary function and serum inflammatory factor levels in patients with stable COPD. *Journal of Frontiers of Medicine*. 2019;9(23):220–221.
4. Jiao L. Acupuncture at Feishu and Geshu points in the treatment of 30 cases of stable chronic obstructive pulmonary disease. *Traditional Chinese Medicinal Research*. 2020; 33(05):60–63.
5. Li D, Liu GY. Preventive value of tiotropium bromide combined with acupuncture on acute recurrence in patients with stable COPD. *Chinese Journal of Public Health Engineering*. 2020;19(4):636–638.
6. Zhang YQ. Clinical study on the effect of floating needle therapy on patients with acute exacerbation of chronic obstructive pulmonary disease. Chinese Community Doctors. 2020;36(2):84–85.
7. Wang X, Wang H. Effect of Peitu Shengjin Acupuncture Therapy on Lung Function and Blood Oxygen Saturation in Patients with COPD. *Journal of Clinical Acupuncture and Moxibustion*. 2021;37(03):27–31.

45. Schulz KF, Altman DG, Moher D; CONSORT Group. CONSORT 2010 statement: updated guidelines for reporting parallel group randomised trials. BMJ. 2010;340:c332. doi:10.1136/bmj.c332

46. MacPherson H, Altman DG, Hammerschlag R, et al.; STRICTA Revision Group. Revised STandards for Reporting Interventions in Clinical Trials of Acupuncture (STRICTA): extending the CONSORT statement. PLoS Med. 2010;7(6):e1000261. doi:10.1371/journal.pmed.1000261
